# Supplementary material
Source: publisher figshare collection journal article supplement (https://geolsoc.figshare.com/articles/dataset/_/3453212)
Supplement: Supplementary file 2 [file 1]

**Supplementary Data File 1: Overview of the investigated outcrops with GPS coordinates and position of the different homogeneous siltstone bed (HSB) and samples.**

| Site                                  | Outcrop                                | HSB                 | Samples                                                   | # Specimen |
|---------------------------------------|----------------------------------------|---------------------|-----------------------------------------------------------|------------|
| Site 1                                | Outcrop 1A<br>N 48°12.907' W 4°33.468' | HSB 1               | TH011, TH012, TH013, TH014,<br>TH015, TH016, TH017, TH018 | 65         |
|                                       |                                        | HSB 2               | TH003, TH004, TH009, TH010,<br>TH019, TH020               | 51         |
|                                       | Outcrop 1B<br>N 48°12.953' W 4°33.412' | HSB 3               | TH032, TH033, TH034, TH035,<br>TH036, TH038, TH039        | 82         |
| Site 2                                | Outcrop 2A<br>N 48°19.121' W 4°34.864' | HSB 4               | TH056, TH057, TH058, TH061                                | 23         |
|                                       |                                        | HSB 5               | TH060, TH062, TH063                                       | 22         |
|                                       |                                        | HSB 6               | /                                                         | /          |
|                                       | Outcrop 2B<br>N 48°19.159' W 4°34.896' | HSB 7               | TH041, TH043                                              | 20         |
|                                       | HSB 8                                  | TH049               | 6                                                         |            |
| Outcrop 2C<br>N 48°19.876' W 4°33.941 | HSB 9                                  | TH053, TH054, TH055 | 17                                                        |            |
| Site 3                                | Outcrop 3A<br>N 48°24.367' W 3°54.714' | HSB 10              | TH129, TH131, TH132, TH133                                | 40         |
|                                       |                                        | HSB 11              | TH121, TH123, TH124, TH127                                | 49         |
| Site 4                                | Outcrop 4A<br>N 48°20.218' W 3°59.752' | HSB 12              | TH107, TH108, TH112                                       | 35         |
|                                       |                                        | HSB 13              | TH111                                                     | 11         |
|                                       | Outcrop 4B<br>N 48°20.211' W 3°59.765' | HSB 14              | TH103                                                     | 13         |
| Site 5                                | Outcrop 5A<br>N 48°9.441' W 3°58.037'  | HSB 15              | TH149                                                     | 5          |
|                                       |                                        | HSB 16              | TH142, TH143, TH144                                       | 30         |
|                                       |                                        | HSB 17              | TH148                                                     | 15         |
|                                       | Outcrop 5B<br>N 48°9.458' W 3°58.083'  | HSB 18              | /                                                         | /          |
|                                       |                                        | HSB 19              | TH151                                                     | 12         |
|                                       |                                        | HSB 20              | TH152, TH153                                              | 26         |
|                                       |                                        | HSB 21              | TH154                                                     | 13         |
|                                       |                                        | HSB 22              | TH155, TH157, TH158                                       | 36         |
|                                       |                                        | HSB 23              | TH159, TH160                                              | 19         |
|                                       |                                        | HSB 24              | TH161, TH162, TH164, TH166                                | 34         |
| HSB 25                                | /                                      | /                   |                                                           |            |
